# Supplementary material for: The Impact of Increased CO2 and Drought Stress on the Secondary Metabolites of Cauliflower (Brassica oleracea var. botrytis) and Cabbage (Brassica oleracea var. capitata)
Source: MDPI journal article supplement (doi:10.3390/plants12173098), 2023-08-29
Supplement: s1 [file s1]

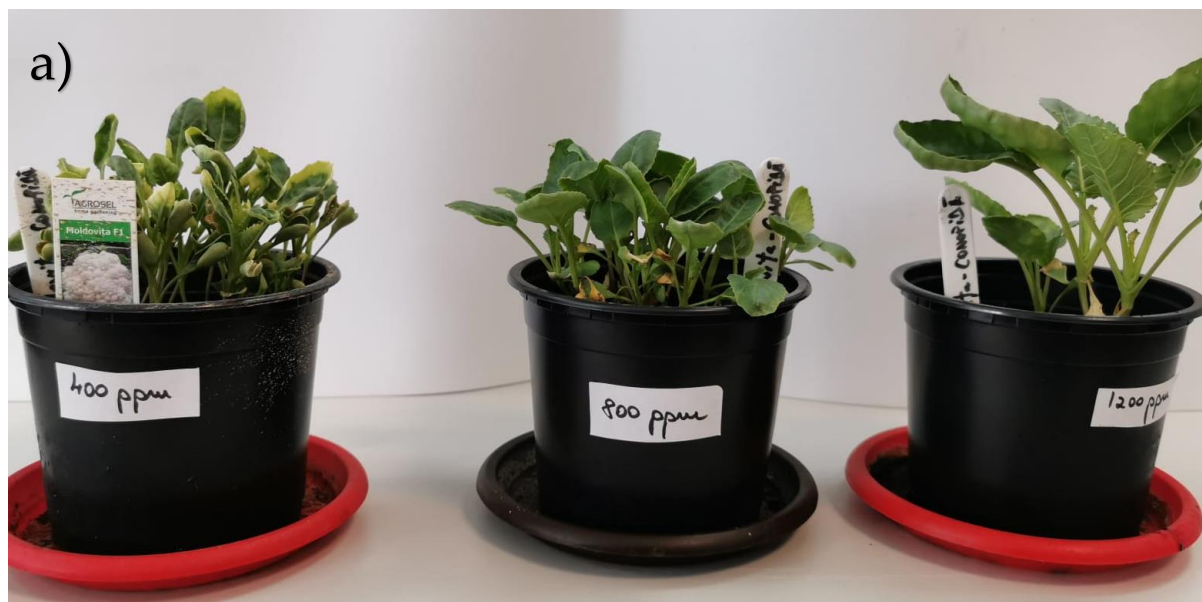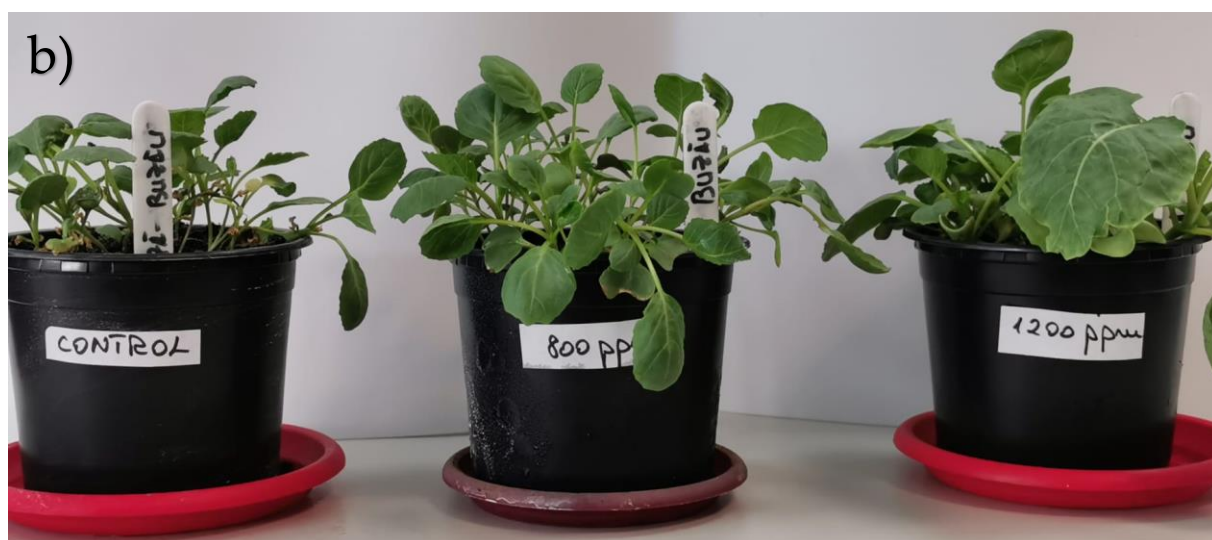

Figure S1. Plants from Green Cabbage (*Brassica oleracea* var. *capitata*, Varza de Buzau (Sem-Luca, Timisoara, Romania) (a) and Cauliflower (*Brassica oleracea* var. *botrytis*, Moldovita F1 (Agrosel, Campia-Turzii, Romania) (b) grown at 400 (control), 800 and 1200 ppmv carbon dioxide.
